# Supplementary material for: Protective effects of Huangqin Decoction against ulcerative colitis and associated cancer in mice
Source: PubMed Central journal article supplement (PMC5308679; doi:10.18632/oncotarget.11426), 2016-08-19
Supplement: oncotarget-07-61643-s001.pdf [file oncotarget-07-61643-s001.pdf]

## Protective effects of Huangqin Decoction against ulcerative colitis and associated cancer in mice

### Supplementary Materials

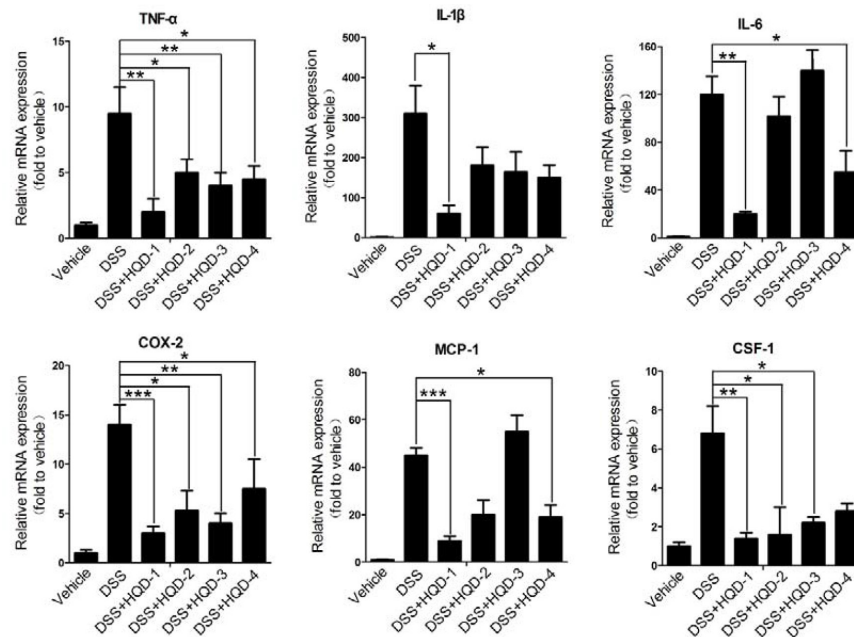

**Supplementary Figure S1: Effects of HQD preparations on the production of inflammatory cytokines in colons of mice with DSS-induced acute ulcerative colitis.** Quantitative RT-PCR analysis for TNF- $\alpha$ , IL-1 $\beta$ , IL-6, COX-2, MCP-1 and CSF-1 was performed on total RNAs extracted from the colons. All mRNA levels were normalized to the levels of GAPDH mRNA. Data are presented as mean  $\pm$  SD of 7 mice in each group. \* $P$  < 0.05; \*\* $P$  < 0.01; \*\*\* $P$  < 0.001, versus DSS-treated group. HQD, Huangqin decoction.

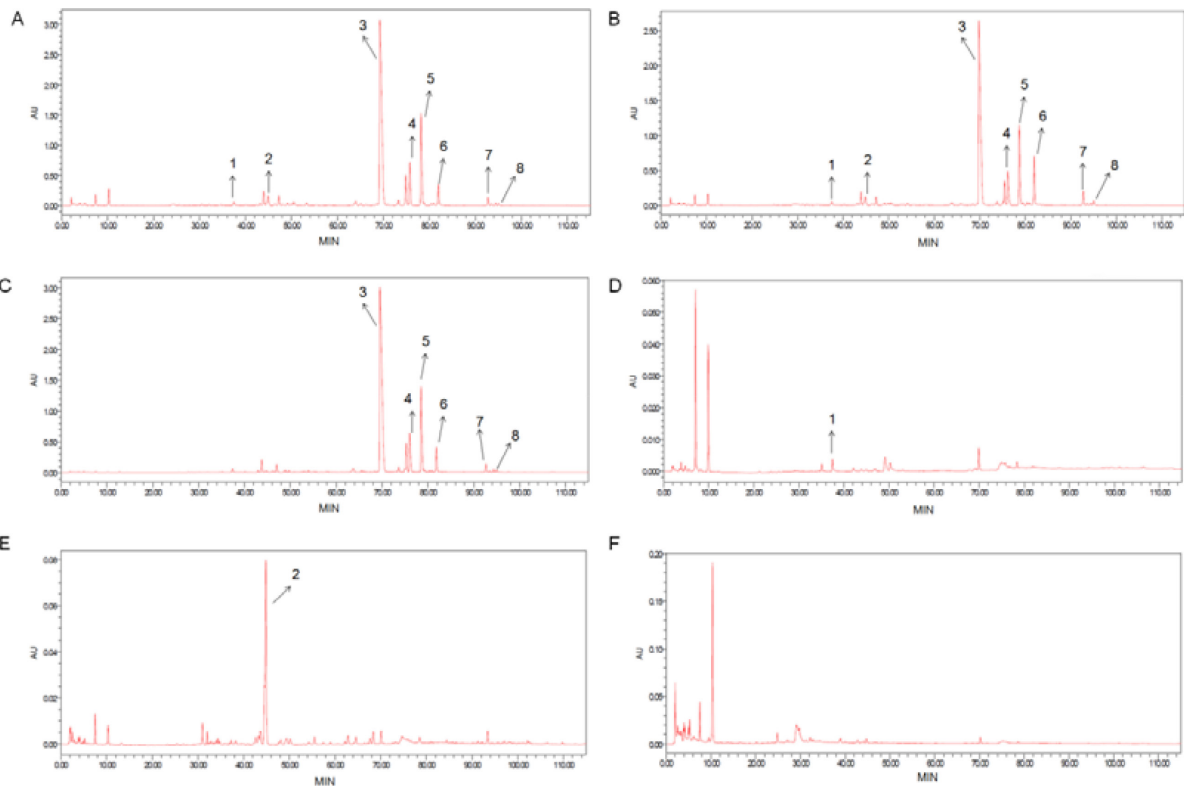

**Supplementary Figure S2: HPLC chromatogram of single herbal and HQD extracts. (A) HQD-1, (B) HQD-2, (C) *Scutellaria baicalensis* Georgi, (D) *Paeonia lactiflora* Pall, (E) *Glycyrrhiza uralensis* Fisch, (F) *Ziziphus jujuba* Mill.**

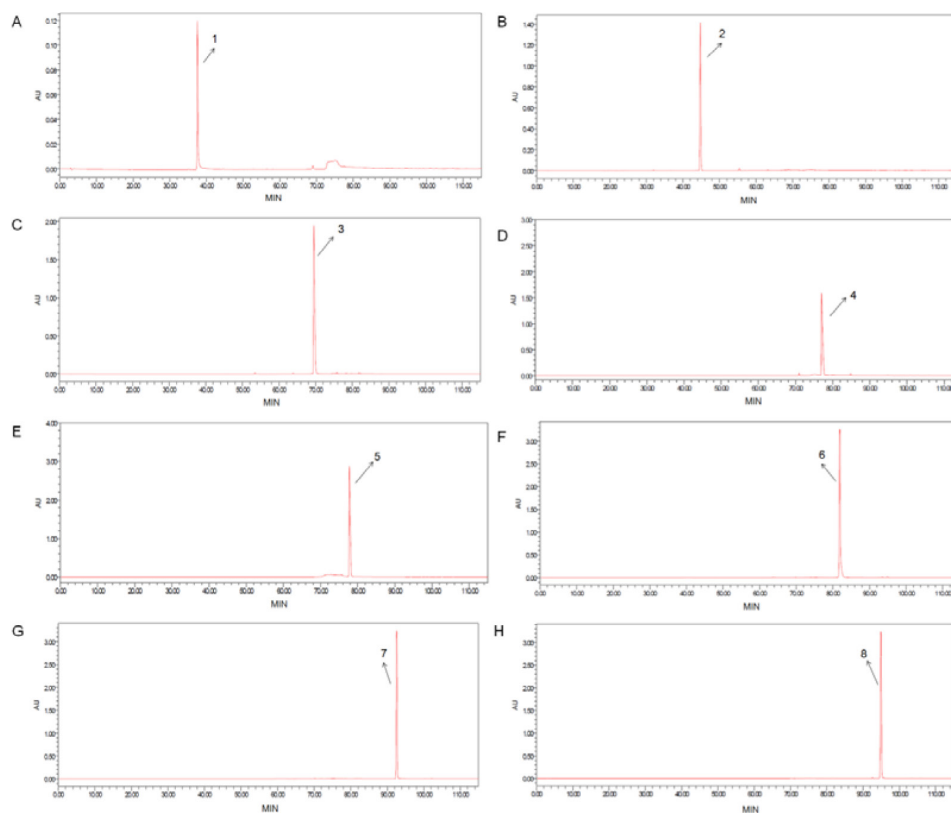

**Supplementary Figure S3: HPLC chromatogram of standard.** (A) Paeoniflorin, (B) Liquiritin, (C) Baicalin, (D) Oroxylin A-7-glucuronide, (E) Wogonoside, (F) Baicalein, (G) Wogonin, (H) Oroxylin A.

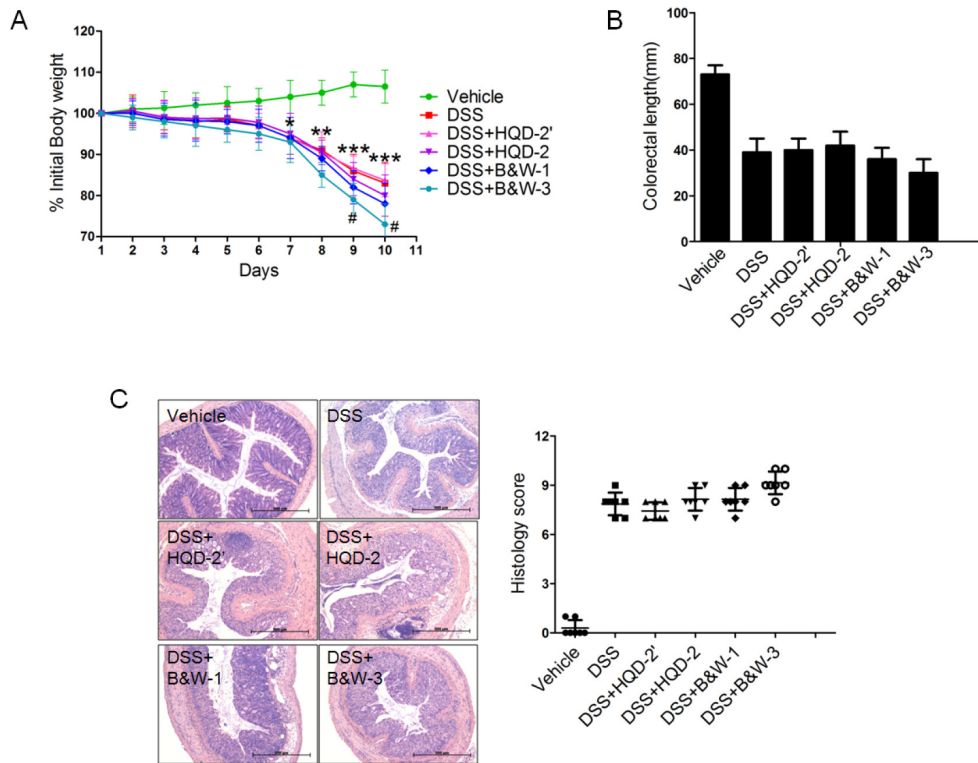

**Supplementary Figure S4: The effect of baicalein and wogonin on DSS-induced acute ulcerative colitis in mice. (A)** Body weight changes after DSS induction of colitis. **(B)** Statistics of colorectum length of each group. **(C)** Representative H&E-stained colorectum sections (magnification $\times 100$ ) and histology score. Data are presented as mean  $\pm$  SD of 7 mice in each group. \* $P < 0.05$ ; \*\* $P < 0.01$ ; \*\*\* $P < 0.001$ , DSS versus vehicle group. # $P < 0.05$ ; ## $P < 0.01$ ; ### $P < 0.001$ , DSS+constituents-2 versus DSS group. HQD, Huangqin decoction.

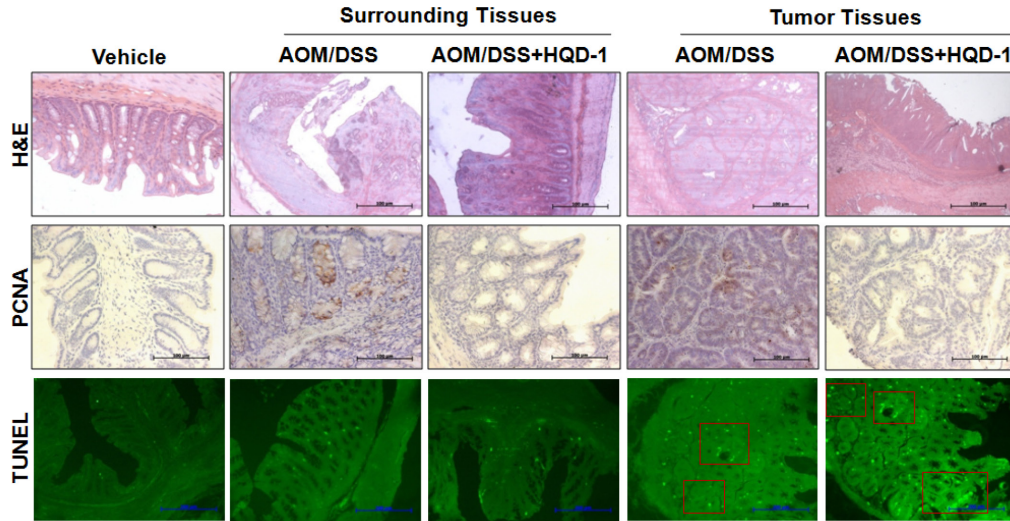

**Supplementary Figure S5: HQD-1 suppressed the development of colitis-associated colon cancer.** Representative H&E-stained colon sections (magnification  $\times 400$ ), PCNA levels in colonic tissues (magnification  $\times 400$ ) and TUNEL staining in colonic tissues (magnification  $\times 400$ ). HQD, Huangqin decoction.

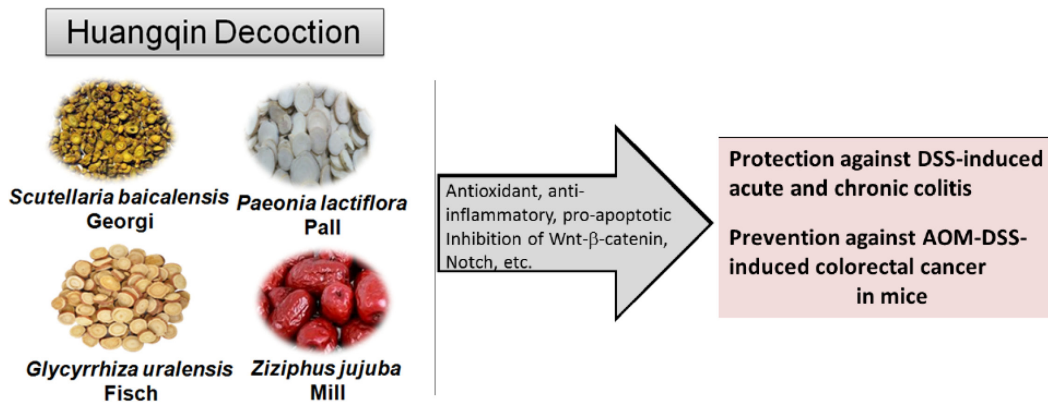

**Supplementary Figure S6: The ingredients, activities against colitis and associated colon carcinogenesis, and possible mechanisms of action of Huangqin decoction.** The decoction is made from four different herbs. Its prevention against colitis and associated colon carcinogenesis is proposed to be due to the antioxidant, anti-inflammatory and pro-apoptotic activities as well as the inhibition of Wnt- $\beta$ -catenin, Notch and other molecular pathways.

**Supplementary Table S1: The composition of HQD**

| Species                               | Chinese name | Plant part        | Grams, g |
|---------------------------------------|--------------|-------------------|----------|
| <i>Scutellaria baicalensis</i> Georgi | Huang qin    | Root              | 9        |
| <i>Paeonia lactiflora</i> Pall        | Shao yao     | Root              | 6        |
| <i>Glycyrrhiza uralensis</i> Fisch    | Gan cao      | Root and rhizomes | 6        |
| <i>Ziziphus jujuba</i> Mill           | Da zao       | Fruit             | 49       |
| Total amount                          |              |                   | 70       |

**Supplementary Table S2: Compounds in HQD**

| No. | t <sup>R</sup> (min) | Identification           | Chemical structure                                                                  | Molecular formula                               | Source                                |
|-----|----------------------|--------------------------|-------------------------------------------------------------------------------------|-------------------------------------------------|---------------------------------------|
| 1   | 37.561               | Paeoniflorin             | 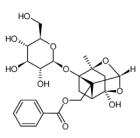   | C <sub>23</sub> H <sub>28</sub> O <sub>11</sub> | <i>Paeonia lactiflora</i> Pall        |
| 2   | 44.797               | Liquiritin               |   | C <sub>21</sub> H <sub>22</sub> O <sub>9</sub>  | <i>Glycyrrhiza uralensis</i> Fisch    |
| 3   | 54.002               | Baicalin                 |  | C <sub>21</sub> H <sub>18</sub> O <sub>11</sub> | <i>Scutellaria baicalensis</i> Georgi |
| 4   | 75.484               | Oroxylin A-7-glucuronide |  | C <sub>22</sub> H <sub>20</sub> O <sub>11</sub> | <i>Scutellaria baicalensis</i> Georgi |
| 5   | 78.004               | Wogonoside               |  | C <sub>22</sub> H <sub>20</sub> O <sub>11</sub> | <i>Scutellaria baicalensis</i> Georgi |
| 6   | 81.748               | Baicalein                |  | C <sub>15</sub> H <sub>10</sub> O <sub>5</sub>  | <i>Scutellaria baicalensis</i> Georgi |
| 7   | 92.537               | Wogonin                  |  | C <sub>16</sub> H <sub>12</sub> O <sub>5</sub>  | <i>Scutellaria baicalensis</i> Georgi |
| 8   | 94.824               | Oroxylin A               |  | C <sub>16</sub> H <sub>12</sub> O <sub>5</sub>  | <i>Scutellaria baicalensis</i> Georgi |

**Supplementary Table S3: Primers used for real-time RT-PCR**

| Primer        | Sequences                                                                                |
|---------------|------------------------------------------------------------------------------------------|
| TNF- $\alpha$ | Forward primer, 5'- GGAACACGTCGTGGGATAATG<br>Reverse primer, 5'- GGCAGACTTTGGATGCTTCTT   |
| IL-1 $\beta$  | Forward primer, 5'- GCAACTGTTTCCTGAACTCAACT<br>Reverse primer, 5'- ATCTTTTGGGGTCCGTCAACT |
| IL-6          | Forward primer, 5'- TAGTCCTTCCTACCCCAATTTCC<br>Reverse primer, 5'- TTGGTCCTTAGCCACTCCTTC |
| COX-2         | Forward primer, 5'- AGGTCATTGGTGGAGAGGTG<br>Reverse primer, 5'- CCTGCTTGAGTATGTGCAC      |
| MCP-1         | Forward primer, 5'- AGGTGTCCCAAAGAAGCTGTA<br>Reverse primer, 5'- ATGTCTGGACCCATTCTTCT    |
| CSF-1         | Forward primer, 5'- CCCATATTGCGACACCGAA<br>Reverse primer, 5'- AAGCAGTAACTGAGCAACGGG     |
| GAPDH         | Forward primer, 5'- CTCCCCTCTTCCACCTTCG<br>Reverse primer, 5'- CCACCACCCTGTTGCTGTAG      |

**Supplementary Table S4: Validation of linearity, sensitivity, precision, stability and repeatability**

| Analyte                      | Linearity                         |                                      | Sensitivity (ng/mL)    |         | Precision (RSD, %) |                   | Stability (RSD, %, n = 6) |       | Repeatability (RSD, %, n = 3) |       |       |
|------------------------------|-----------------------------------|--------------------------------------|------------------------|---------|--------------------|-------------------|---------------------------|-------|-------------------------------|-------|-------|
|                              | Range ( $\mu\text{g}/\text{mL}$ ) | Equation                             | R <sup>2</sup>         | LOD     | LOQ                | Intra-day (n = 6) | Inter-day (n = 3)         | HQD-1 | HQD-2                         | HQD-1 | HQD-2 |
| Paeoniflorin (1)             | 3.815–38.15                       | $y = 8 \times 10^7 x + 13445$        | R <sup>2</sup> = 0.990 | 863.58  | 4263.45            | 1.03              | 1.29                      | 1.79  | 0.12                          | 1.29  | 1.02  |
| Liquiritin (2)               | 1.155–11.55                       | $y = 1 \times 10^9 x + 38914$        | R <sup>2</sup> = 0.993 | 67.46   | 325.50             | 1.12              | 2.02                      | 2.98  | 1.09                          | 1.02  | 1.79  |
| Baicalin (3)                 | 1.21–12.1                         | $y = 1 \times 10^8 x + 3 \times 106$ | R <sup>2</sup> = 0.997 | 360     | 3025               | 2.15              | 2.15                      | 2.02  | 2.19                          | 2.15  | 2.13  |
| Oroxylin A-7-glucuronide (4) | 2.125–34.0                        | $y = 3 \times 10^8 x + 3 \times 106$ | R <sup>2</sup> = 0.991 | 474.3   | 1517.85            | 2.79              | 2.09                      | 2.14  | 2.42                          | 2.32  | 2.92  |
| Wogonoside (5)               | 4.25–34.0                         | $y = 3 \times 10^8 x - 7 \times 106$ | R <sup>2</sup> = 0.991 | 2547.72 | 2421.84            | 2.23              | 1.29                      | 1.23  | 1.18                          | 1.23  | 1.09  |
| Baicalin (6)                 | 0.745–7.45                        | $y = 5 \times 10^9 x - 20357$        | R <sup>2</sup> = 0.999 | 21.88   | 72.53              | 1.28              | 1.02                      | 1.22  | 0.98                          | 1.22  | 0.98  |
| Wogonin (7)                  | 0.113–2.25                        | $y = 1 \times 10^{10} x + 17890$     | R <sup>2</sup> = 0.999 | 5.82    | 31.66              | 2.79              | 1.79                      | 1.79  | 0.77                          | 0.79  | 0.79  |
